# Supplementary material
Source: Springer Nature journal article supplement (https://www.springermedizin.de/resource/supplementary/12888_2011_937_MOESM3_ESM.pdf/9479286)

BDI-scores in 2005

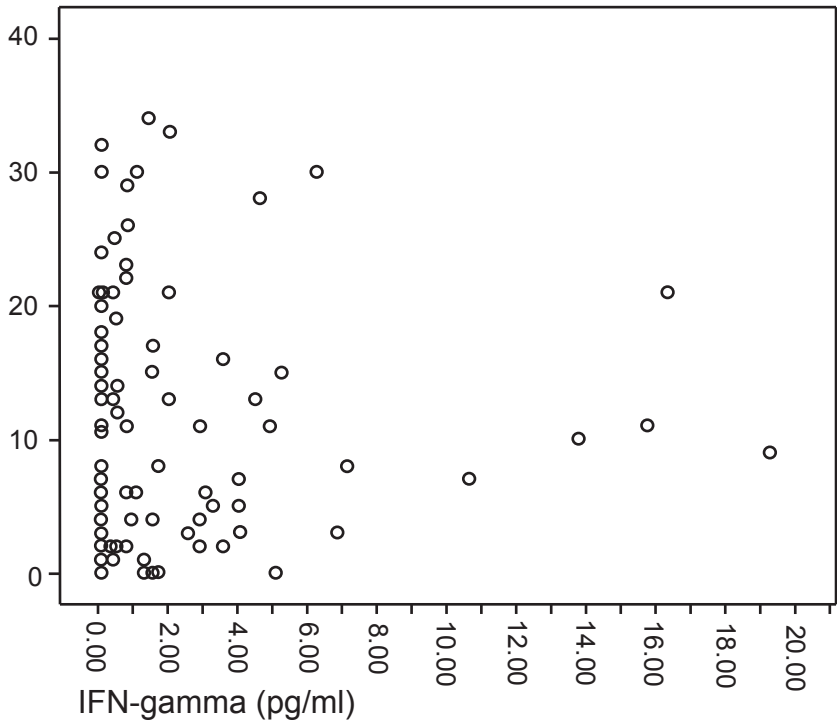

Supplement: MOESM3 [file 9479286]
